# Supplementary material for: Genetic Analysis of Floral Symmetry in Van Gogh's Sunflowers Reveals Independent Recruitment of CYCLOIDEA Genes in the Asteraceae
Source: PLoS Genet. 2012 Mar 29;8(3):e1002628. doi: 10.1371/journal.pgen.1002628 (PMC3315478; doi:10.1371/journal.pgen.1002628)
Supplement: Table S2 — Primer sequences used throughout this study. (PDF) [file pgen.1002628.s003.pdf]

Supplementary Table 2 - Primer sequences

|                               | Forward Primer                      | Reverse Primer           |
|-------------------------------|-------------------------------------|--------------------------|
| <b>PCR and sequencing:</b>    |                                     |                          |
| <i>HaCYC2c</i> CDS (1)        | GGTAGAAAATTACACAAAAATGACAGG         | TAAGAGACCACCACCCCTCTTA   |
| <i>HaCYC2c</i> CDS (2)        | TAAAGTTTGGAGTGACCGTGTG              | TCCCTTGATGGTCTCTAGGAAA   |
| <i>HaCYC2c</i> CDS (3)        | TAGGTTTTGACAAAGCAAGCAA              | GGTTTATTTGGACGGATAGATTG  |
| <i>HaCYC2c-dbl</i> insertion  | GCTCATCAACTGGAACAAAGA               | ATTAGCGGCGACCACAGTATTA   |
| <i>HaCYC2c-tub</i> insertion  | CAATCAAACCTCTGGGGTCAAT              | CAGTACGTGGATATGGTCATGG   |
| <i>HaCYC2c-3288</i> insertion | TAATTCACGAGGAGCAGAGTCA              | ACATCCAGCACCCCTGAACTAT   |
| <i>HaCYC2b</i>                | ATGCTTTCCTCATCCACCAA                | CCTGAAAGCTTGAATCCTTTG    |
| <i>HaCYC2e</i> (1)            | TGGCATTAACTCCACACAAAA               | CCTGAGAGAAATGGGTTGAAGT   |
| <i>HaCYC2e</i> (2)            | TATGTCTTCCCTCCTTCCAATC              | CCTGCCTCATCAATGAAACATA   |
| <b>SNP genotyping:</b>        |                                     |                          |
| <i>HaCYC2b</i>                | TAATGCCAAGTTTCTGGAAGC               | CTCTTTCTCTTGCCTCTGC      |
| <i>HaCYC2bAnchor*</i>         | AAGAGAAGTCATTACTGAAACGTGTGGATGGAAAA | n/a                      |
| <i>HaCYC2bSensor#</i>         | GAAGAAAGGGACTCAAAGAGCCAAAGTTA       | n/a                      |
| <i>HaCYC2c</i>                | TCCACAACCATCAACCCTAC                | ATGGGTAAACTACTGACTCCAA   |
| <i>HaCYC2cAnchor*</i>         | CCTTCATGATCAAGCAGCTGGTTTTGAC        | n/a                      |
| <i>HaCYC2cSensor+</i>         | TCTAACTCTTGTGCATTTGAAGGCATAT        | n/a                      |
| <i>HaCYC2e</i>                | CAAGAGCTAGAGAAAGGACTAA              | ATTGTGCTGATAACTATACAGTAA |
| <i>HaCYC2eAnchor*</i>         | AGCTAGACTGGAGTGTTAAATTTGAAGAACAG    | n/a                      |
| <i>HaCYC2eSensor#</i>         | GTCAACAGGCGCACTCTTGGA               | n/a                      |
| <b>qRT-PCR</b>                |                                     |                          |
| <i>HaCYC2bRT</i>              | CCACTCTTCATCTTCAGCTCTCAC            | TGGCTCTTTGAGTCCCTTTCTTCC |
| <i>HaCYC2cRT</i>              | TTGTTGTATCAGATGAGTGCATCTCCCAA       | ATTGCACGGTGACTCTGCTCCTC  |
| <i>HaCYC2eRT</i>              | AGTTGTGTTCTTGAAACCGACGA             | TCTTGCCTCTGCCCTTGACTGATT |
| <i>ACTIN2RT</i>               | AGGATGAGCAAGGAAATCACGGCT            | GTTGGAAGGTGCTGAGTGATGCAA |

\* denotes primer was 3' labelled with Fluorescein

# denotes primer was 5' labelled with Texas Red and a 3' phosphate

+ denotes primer was 5' labelled with Biodipy630 and a 3' phosphate
